# Supplementary material for: Identification and Introgression of a Novel HMW-GS Gene from Aegilops tauschii
Source: MDPI journal article supplement (doi:10.3390/agronomy12112709), 2022-11-01
Supplement: s1 [file s1]

Table S1 The primers used in this study.

| Primer | Sequences (5'-3')                              |
|--------|------------------------------------------------|
| PF1    | ATGGCTAAGCGGCTGGTCCTCTTTGCGGC                  |
| PR1    | CTATCACTGGCTAGCCGACAATGCGTCGC                  |
| PF2    | GAAGGTGAGGCCTCTGGGCAACTACA                     |
| PR2    | CTATCACTGGCTGGCCGACAATGCGTCG                   |
| PF3    | GACAAGGGCAACAAGGGCAC <b><i>T</i></b> GCCCAACGT |
| PR3    | AGCAGCCAGGACAAGGGCAACAAGGGCAC <b><i>T</i></b>  |

The positions of single-base substitution mutation were shown in bold italics.
